# Supplementary material for: Highlights of biosynthetic enzymes and natural products from symbiotic cyanobacteria
Source: Royal Society of Chemistry journal article supplement (doi:10.1039/d3np00011g), 2023-01-01
Supplement: d3np00011g1.pdf [file d3np00011g1.pdf]

## **Highlights of biosynthetic enzymes and natural products from symbiotic cyanobacteria**

*Paul M. D'Agostino*

Technical University of Dresden, Chair of Technical Biochemistry, Dresden, Germany

## **SUPPORTING INFORMATION**

**Table S1: List of publicly available cyanobiont genomes**

| Organism                                                             | Isolation source | Host Organism                       | Country of Origin | NCBI/JGI Accession | NCBI/JGI BioProject | Contigs | Genome Size (Mb) | Ref. |
|----------------------------------------------------------------------|------------------|-------------------------------------|-------------------|--------------------|---------------------|---------|------------------|------|
| <i>Prochloron didemni</i> P1-Palau                                   | Ascidian         | <i>Lissoclinum patella</i>          | Palau             | AGRF000000000      | PRJNA74381          | 101     | 6.20             | 1    |
| <i>Prochloron didemni</i> P2-Fiji                                    | Ascidian         | <i>Lissoclinum patella</i>          | Fiji              | AFSJ000000000      | PRJNA82333          | 3261    | 7.52             | 1    |
| <i>Prochloron didemni</i> P3-Solomon                                 | Ascidian         | <i>Lissoclinum patella</i>          | Solomon Islands   | AFSK000000000      | PRJNA82335          | 1964    | 5.86             | 1    |
| <i>Prochloron didemni</i> P4-Papua New Guinea                        | Ascidian         | <i>Lissoclinum patella</i>          | Papua New Guinea  | AGGA000000000      | PRJNA82337          | 690     | 5.69             | 1    |
| <i>Desmonostoc muscorum</i> LEGE 12446                               | Cycad            | <i>Cycas revoluta</i>               | Portugal          | JADXS000000000     | PRJNA667061         | 12      | 9.64             | 2    |
| <i>Nostoc cycadae</i> WK-1                                           | Cycad            | <i>Cycas revoluta</i>               | Japan             | BDGE000000000      | PRJDB4931           | 150     | 6.77             | 3    |
| <i>Nostoc punctiforme</i> PCC 73102                                  | Cycad            | <i>Macrozamia</i> sp.               | Australia         | CP001037           | PRJNA216            | 1       | 9.06             | 4    |
| <i>Nostoc</i> sp. 106C                                               | Cycad            | <i>Dioon merolae</i>                | Mexico            | MTAW000000000      | PRJNA360305         | 241     | 8.66             | 5    |
| <i>Nostoc</i> sp. 3335mG                                             | Cycad            | <i>Dioon edule</i>                  | Mexico            | QHKA000000000      | PRJNA472998         | 714     | 9.23             | 5    |
| <i>Nostoc</i> sp. LEGE 12447                                         | Cycad            | <i>Cycas revoluta</i>               | Portugal          | JADEXT000000000    | PRJNA667061         | 109     | 8.60             | 6    |
| <i>Nostoc</i> sp. LEGE 12450                                         | Cycad            | <i>Encephalartos horridus</i>       | Portugal          | JADEXU000000000    | PRJNA667061         | 415     | 8.60             | 6    |
| <i>Nostoc</i> sp. PA-18-2419                                         | Cycad            | <i>Zamia pseudoparasitica</i>       |                   | SZNH000000000      | PRJNA540319         | 106     | 7.62             | 7    |
| <i>Nostoc</i> sp. RF31YmG                                            | Cycad            | <i>Dioon merolae</i>                | Mexico            | MTAX000000000      | PRJNA360315         | 149     | 9.2              | 5    |
| <i>Nostoc</i> sp. T09                                                | Cycad            | <i>Dioon caputoi</i>                | Mexico            | MTAV000000000      | PRJNA360300         | 270     | 8.25             | 5    |
| <i>Nostocales cyanobacterium</i> LEGE 12452                          | Cycad            | <i>Encephalartos horridus</i>       | Portugal          | JADEXV000000000    | PRJNA667061         | 552     | 8.40             | 6    |
| <i>Calothrix rhizosoleniae</i> SC01                                  | Diatom           | <i>Chaetoceros</i>                  |                   | FYBH000000000      | PRJEB19506          | 472     | 5.97             | 8    |
| Cyanobacterium endosymbiont of <i>Epithemia turgida</i> isolate EtSB | Diatom           | <i>Epithemia turgida</i>            | Japan             | AP012549           | PRJDB498            | 1       | 2.80             | 9    |
| <i>Richelia intracellularis</i> HH01                                 | Diatom           | <i>Hemiaulus hauckii</i>            | Brazil            | CAIY000000000      | PRJEA104979         | 38      | 3.30             | 10   |
| <i>Richelia intracellularis</i> RC01                                 | Diatom           | <i>Rhizosolenia clevei</i>          |                   | CBZS000000000      | PRJEB5207           | 857     | 5.50             | 8    |
| Cyanobiont of <i>Ornithocercus magnificus</i> strain OmCyn01         | Dinoflagellate   | <i>Ornithocercus magnificus</i>     | Japan             | BIMP000000000      | PRJDB7787           | 16      | 1.88             | 11   |
| <i>Candidatus</i> Atelocyanobacterium thalassa UBA4158               | Eukaryotic alga  |                                     |                   | DFVO000000000      | PRJNA348753         | 13      | 1.45             | 12   |
| <i>Candidatus</i> Atelocyanobacterium thalassa SIO64986              | Eukaryotic alga  |                                     | USA               | JPSF000000000      | PRJNA256120         | 52      | 1.49             | 13   |
| <i>Candidatus</i> Atelocyanobacterium thalassa ALOHA                 | Eukaryotic alga  |                                     |                   | NC_013771          | PRJNA30917          | 1       | 1.44             | 14   |
| <i>Nostoc</i> sp. Moss2                                              | Feathermoss      | <i>Pleurozium schreber</i>          |                   | 2630968269         |                     | 24      | 9.17             | 15   |
| <i>Nostoc</i> sp. Moss3                                              | Feathermoss      | <i>Pleurozium schreber</i>          |                   | 2630969009         |                     | 12      | 9.10             | 15   |
| <i>Nostoc</i> sp. Moss4                                              | Feathermoss      | <i>Pleurozium schreber</i>          |                   | 2630968271         |                     | 26      | 8.98             | 15   |
| <i>Nostoc</i> sp. Moss5                                              | Feathermoss      | <i>Hylocomium splendens</i>         |                   | 2630968270         |                     | 67      | 7.24             | 15   |
| <i>Nostoc</i> sp. Moss6                                              | Feathermoss      | <i>Hylocomium splendens</i>         |                   | 2630969011         |                     | 11      | 7.14             | 15   |
| <i>Nostoc azollae</i>                                                | Freshwater Fern  | <i>Azolla filiculoides</i>          | Netherlands       | CAJTBH000000000    | PRJEB45214          | 353     | 4.79             |      |
| <i>Nostoc azollae</i> IRR1 2001                                      | Freshwater Fern  | <i>Azolla mexicana</i> IRR1 2001    | USA               | CAJTAI000000000    | PRJEB45214          | 341     | 4.87             |      |
| <i>Nostoc azollae</i> IRR1 3004                                      | Freshwater Fern  | <i>Azolla caroliniana</i> IRR1 3004 | Brazil            | CAJTBM000000000    | PRJEB45214          | 356     | 4.72             |      |
| <i>Nostoc azollae</i> IRR1 3017                                      | Freshwater Fern  | <i>Azolla caroliniana</i> IRR1 3017 | Uruguay           | CAJSZD000000000    | PRJEB45214          | 356     | 4.70             |      |
| <i>Nostoc azollae</i> IRR1 4021                                      | Freshwater Fern  | <i>Azolla microphylla</i> IRR1 4021 | Ecuador           | CAJTAD000000000    | PRJEB45214          | 336     | 4.85             |      |
| <i>Nostoc azollae</i> IRR1 5001                                      | Freshwater Fern  | <i>Azolla nilotica</i> IRR1 5001    | Sudan             | CAJSYP000000000    | PRJEB45214          | 264     | 4.77             |      |
| <i>Nostoc azollae</i> IRR1 6502                                      | Freshwater Fern  | <i>Azolla rubra</i> IRR1 6502       | Australia         | CAJSZE000000000    | PRJEB45214          | 368     | 4.70             |      |
| <i>Nostoc</i> sp. UCD120                                             | Freshwater Fern  | <i>Azolla</i>                       |                   | JACKZR000000000    | PRJNA591939         | 1143    | 8.41             | 16   |
| <i>Nostoc</i> sp. UCD121                                             | Freshwater Fern  | <i>Azolla</i>                       |                   | JACKZS000000000    | PRJNA591940         | 631     | 8.50             | 16   |
| <i>Nostoc</i> sp. UCD122                                             | Freshwater Fern  | <i>Azolla</i>                       |                   | JACKZN000000000    | PRJNA591941         | 1244    | 8.29             | 16   |
| <i>Nostoc</i> sp. 2RC                                                | Freshwater Fern  | <i>Azolla pinnata</i>               |                   | JACKZU000000000    | PRJNA591930         | 869     | 8.68             | 16   |
| <i>Trichormus (Nostoc) azollae</i> 0708                              | Freshwater Fern  | <i>Azolla</i>                       |                   | NC_014248          | PRJNA30807          | 3       | 5.49             | 17   |
| <i>Anthocerotibacter panamensis</i> C109                             | Hornwort         | <i>Leiosporoceros dussii</i>        | Panama            | CP062698           | PRJNA665722         | 1       | 4.19             | 18   |
| <i>Nostoc</i> sp. C057                                               | Hornwort         | <i>Phaeoceros</i>                   | USA               | CP040281           | PRJNA534312         | 16      | 9.23             | 19   |
| <i>Nostoc</i> sp. TCL240-02                                          | Hornwort         | <i>Leiosporoceros dussii</i>        | Panama            | CP040094           | PRJNA534312         | 1       | 7.88             | 19   |
| <i>Nostoc</i> sp. TCL026-01                                          | Hornwort         | <i>Leiosporoceros dussii</i>        | Panama            | CP040297           | PRJNA534312         | 8       | 7.39             | 19   |
| <i>Nostoc punctiforme</i> NIES-2108                                  | Lichen           | <i>Peltigera didactyla</i>          | Japan             | LXQE000000000      | PRJNA319602         | 205     | 9.20             |      |
| <i>Nostoc</i> sp. ATCC 53789                                         | Lichen           |                                     | Scotland          | CP046703           | PRJNA588357         | 13      | 8.66             | 20   |
| <i>Nostoc</i> sp. JL23                                               | Lichen           | <i>Peltigera aphthosa</i>           | Canada            | JABXKN000000000    | PRJNA616181         | 157     | 8.06             | 21   |
| <i>Nostoc</i> sp. JL31                                               | Lichen           | <i>Peltigera extenuata</i>          | Canada            | JABXKO000000000    | PRJNA616181         | 123     | 7.63             | 21   |
| <i>Nostoc</i> sp. JL33                                               | Lichen           | <i>Peltigera malacea</i>            | Canada            | JABXKP000000000    | PRJNA616181         | 106     | 7.11             | 21   |

|                                                                                |           |                                   |                 |                 |             |        |       |       |
|--------------------------------------------------------------------------------|-----------|-----------------------------------|-----------------|-----------------|-------------|--------|-------|-------|
| <i>Nostoc</i> sp. JL34                                                         | Lichen    | <i>Peltigera evansiana</i>        | USA             | JABXKQ000000000 | PRJNA616181 | 184    | 7.82  | 21    |
| <i>Nostoc</i> sp. LPT                                                          | Lichen    | <i>Leptogium austroamericanum</i> | USA             | JABXKF000000000 | PRJNA256476 | 190    | 8.61  | 21    |
| <i>Nostoc</i> sp. NMS1                                                         | Lichen    | <i>Peltigera hydrothyria</i>      | Canada          | JABXKG000000000 | PRJNA616181 | 204    | 7.88  | 21    |
| <i>Nostoc</i> sp. NMS2                                                         | Lichen    | <i>Peltigera hydrothyria</i>      | Canada          | JABXKH000000000 | PRJNA616181 | 183    | 7.57  | 21    |
| <i>Nostoc</i> sp. NMS4                                                         | Lichen    | <i>Peltigera venosa</i>           | Finland         | JABXKI000000000 | PRJNA616181 | 440    | 7.58  | 21    |
| <i>Nostoc</i> sp. NMS7                                                         | Lichen    | <i>Solorina crocea</i>            | Finland         | JABXKJ000000000 | PRJNA616181 | 271    | 8.29  | 21    |
| <i>Nostoc</i> sp. NMS8                                                         | Lichen    | <i>Peltigera dolichorrhiza</i>    | Panama          | JABXKK000000000 | PRJNA616181 | 130    | 7.93  | 21    |
| <i>Nostoc</i> sp. NMS9                                                         | Lichen    | <i>Peltigera phyllidiosa</i>      | USA             | JABXKL000000000 | PRJNA616181 | 110    | 8.09  | 21    |
| <i>Nostoc</i> sp. NOS(2021)                                                    | Lichen    | <i>Peltigera aphthosa</i>         | Sweden          | JABXKM000000000 | PRJNA616181 | 346    | 7.62  | 21    |
| <i>Nostoc</i> sp. ' <i>Lobaria pulmonaria</i> (5183) cyanobiont'               | Lichen    | <i>Lobaria pulmonaria</i>         | Iceland         | CP026692        | PRJNA275880 | 5      | 7.34  | 22    |
| <i>Nostoc</i> sp. ' <i>Peltigera membranacea</i> cyanobiont' N6                | Lichen    | <i>Peltigera membranacea</i>      | Iceland         | CP026681        | PRJNA279350 | 11     | 8.90  | 22    |
| <i>Nostoc</i> sp. ' <i>Peltigera membranacea</i> cyanobiont' 210A              | Lichen    | <i>Peltigera membranacea</i>      | Iceland         | NOLJ000000000   | PRJNA389199 | 30     | 8.32  | 22    |
| <i>Nostoc</i> sp. ' <i>Peltigera membranacea</i> cyanobiont' 232               | Lichen    | <i>Peltigera membranacea</i>      | Iceland         | NOLK000000000   | PRJNA389202 | 397    | 9.16  | 22    |
| <i>Nostoc</i> sp. ' <i>Peltigera membranacea</i> cyanobiont' 213               | Lichen    | <i>Peltigera membranacea</i>      | Iceland         | NOLI000000000   | PRJNA389200 | 378    | 8.33  | 22    |
| <i>Nostoc</i> sp. ' <i>Peltigera malacea</i> cyanobiont' DB3992                | Lichen    | <i>Peltigera malacea</i>          | Iceland         | NSHF000000000   | PRJNA389205 | 985    | 8.52  | 22    |
| <i>Nostoc</i> sp. C052                                                         | Liverwort | <i>Blasia pusilla</i>             | USA             | CP040272        | PRJNA534312 | 9      | 9.88  | 19    |
| <i>Nostoc</i> sp. KVJ2                                                         | Liverwort | <i>Blasia pusilla</i>             | Norway          | NNBU000000000   | PRJNA388173 | 4203   | 25.51 | 15    |
| <i>Nostoc</i> sp. KVJ10                                                        | Liverwort | <i>Blasia pusilla</i>             | Norway          | NNBT000000000   | PRJNA388173 | 11,646 | 43.52 | 15    |
| <i>Nostoc</i> sp. KVJ11                                                        | Liverwort | <i>Blasia pusilla</i>             | Norway          | NNBV000000000   | PRJNA388173 | 5030   | 36.88 | 15    |
| <i>Nostoc</i> sp. KVJ20                                                        | Liverwort | <i>Blasia pusilla</i>             | Norway          | LSSA000000000   | PRJNA310825 | 425    | 9.18  | 15,23 |
| Candidatus <i>Aphanocapsa</i> ( <i>Synechococcus</i> ) <i>feldmannii</i> 277cl | Sponge    | <i>Petrosia ficiformis</i>        | Israel          | SRMN000000000   | PRJNA515489 | 214    | 1.90  | 24    |
| Candidatus <i>Aphanocapsa</i> ( <i>Synechococcus</i> ) <i>feldmannii</i> 277cV | Sponge    | <i>Petrosia ficiformis</i>        | Israel          | SRMO000000000   | PRJNA515489 | 100    | 2.50  | 24    |
| Candidatus <i>Aphanocapsa</i> ( <i>Synechococcus</i> ) <i>feldmannii</i> 288cV | Sponge    | <i>Petrosia ficiformis</i>        | Israel          | SRMM000000000   | PRJNA515489 | 125    | 2.20  | 24    |
| Candidatus <i>Paraprochloron terpsiosi</i> SP5CPC1                             | Sponge    | <i>Lamellodysidea herbacea</i>    | Guam            | JACONB000000000 | PRJNA320446 | 397    | 2.79  | 25    |
| Candidatus <i>Synechococcus spongiarum</i> 142                                 | Sponge    | <i>Ircinia variabilis</i>         | Israel          | JXU000000000    | PRJNA273429 | 327    | 2.23  | 26    |
| Candidatus <i>Synechococcus spongiarum</i> 10D                                 | Sponge    | <i>Aplysina aerophoba</i> SAPs10  | Croatia         | MWLG000000000   | PRJNA235061 | 62     | 0.57  | 27    |
| Candidatus <i>Synechococcus spongiarum</i> 10E                                 | Sponge    | <i>Aplysina aerophoba</i> SAPs10  | Croatia         | MWLF000000000   | PRJNA235068 | 50     | 0.45  | 27    |
| Candidatus <i>Synechococcus spongiarum</i> 15L                                 | Sponge    | <i>Aplysina aerophoba</i> SAPs15  | Slovenia        | JYFQ000000000   | PRJNA274222 | 229    | 2.21  | 26    |
| Candidatus <i>Synechococcus spongiarum</i> 15M                                 | Sponge    | <i>Aplysina aerophoba</i> SAPs15  | Slovenia        | MWLD000000000   | PRJNA239126 | 84     | 1.50  | 27    |
| Candidatus <i>Synechococcus spongiarum</i> 15N                                 | Sponge    | <i>Aplysina aerophoba</i> SAPs15  | Slovenia        | MWLE000000000   | PRJNA239118 | 107    | 1.47  | 27    |
| Candidatus <i>Synechococcus spongiarum</i> m9                                  | Sponge    | <i>Theonella swinhoei</i>         | South China Sea | FITM000000000   | PRJEB12597  | 180    | 1.41  | 28    |
| Candidatus <i>Synechococcus spongiarum</i> SH4                                 | Sponge    | <i>Carteriospongia foliascens</i> | Saudi Arabia    | JENA000000000   | PRJNA238381 | 273    | 1.66  | 29    |
| Candidatus <i>Synechococcus spongiarum</i> SP3                                 | Sponge    | <i>Theonella swinhoei</i>         | Israel          | JXQG000000000   | PRJNA255756 | 117    | 2.13  | 29    |
| <i>Hormoscilla</i> sp. GM102CHS1                                               | Sponge    | <i>Lamellodysidea herbacea</i>    | Guam            | JACONF000000000 | PRJNA320446 | 518    | 5.04  | 25    |
| <i>Hormoscilla</i> sp. GM7CHS1pb                                               | Sponge    | <i>Lamellodysidea herbacea</i>    | Guam            | JACONN000000000 | PRJNA320446 | 6      | 6.40  | 25    |
| <i>Hormoscilla</i> sp. GUM007                                                  | Sponge    | <i>Lamellodysidea herbacea</i>    | Guam            | RFFB000000000   | PRJNA320446 | 70     | 6.87  | 25,30 |
| <i>Hormoscilla</i> sp. GUM202                                                  | Sponge    | <i>Lamellodysidea herbacea</i>    | Guam            | RFFC000000000   | PRJNA320446 | 70     | 6.87  | 25,30 |
| <i>Hormoscilla</i> sp. SP12CHS1                                                | Sponge    | <i>Lamellodysidea herbacea</i>    | Guam            | JACOMV000000000 | PRJNA320446 | 573    | 4.99  | 25    |
| <i>Hormoscilla</i> sp. SP5CHS1                                                 | Sponge    | <i>Lamellodysidea herbacea</i>    | Guam            | JACONA000000000 | PRJNA320446 | 445    | 4.83  | 25    |
| <i>Leptothoe kymatousa</i> TAU-MAC 1615                                        | Sponge    | <i>Chondrilla nucula</i>          | Greece          | JADOER000000000 | PRJNA677867 | 18     | 4.07  | 31    |
| <i>Leptothoe spongiaria</i> TAU-MAC 1115                                       | Sponge    | <i>Acanthella acuta</i>           | Greece          | JADOES000000000 | PRJNA677873 | 92     | 5.24  | 31    |

Grey indicates genomes with >100 contigs

**Table S2: List of cyanobiont natural products**

| Compound Class  | Compound Name                 | *CyanoMetDB<br>Compound<br>Identifier | Cyanobiont                                     | Symbiotic host                                            | § MiBIG Ref. | Ref.  |
|-----------------|-------------------------------|---------------------------------------|------------------------------------------------|-----------------------------------------------------------|--------------|-------|
| Aeruginosins    | Aeruginosin875                |                                       | <i>Nostoc sp.</i> KVJ1, KVJ3, SKS1             | <i>Blasia pusilla</i> L. (Genotype I, VII, XIV)           |              | 32    |
| Aeruginosins    | Aeruginosin889                |                                       | <i>Nostoc sp.</i> KVJ1, KVJ3, KVJ4, SKS1, SKS2 | <i>Blasia pusilla</i> L. (Genotype I, VII, VIII, XIV, XV) |              | 32    |
| Aeruginosins    | Dysinosin A                   | CyanoMetDB_1376                       | <i>Hormoscilla spongelliae</i> GUM007          | <i>Lamellodysidea herbacea</i>                            |              | 30,33 |
| Aeruginosins    | Dysinosin B                   | CyanoMetDB_1212                       | <i>Hormoscilla spongelliae</i> GUM007          | <i>Lamellodysidea herbacea</i>                            |              | 30,34 |
| Aeruginosins    | Dysinosin C                   | CyanoMetDB_1424                       | <i>Hormoscilla spongelliae</i> GUM007          | <i>Lamellodysidea herbacea</i>                            |              | 30,34 |
| Aeruginosins    | Dysinosin D                   | CyanoMetDB_1421                       | <i>Hormoscilla spongelliae</i> GUM007          | <i>Lamellodysidea herbacea</i>                            |              | 30,34 |
| Aeruginosins    | Desoxydysinosin C             | CyanoMetDB_2578                       | <i>Hormoscilla spongelliae</i> GUM007          | <i>Lamellodysidea herbacea</i>                            |              | 30    |
| Aeruginosins    | Desoxydysinosin D             | CyanoMetDB_2577                       | <i>Hormoscilla spongelliae</i> GUM007          | <i>Lamellodysidea herbacea</i>                            |              | 30    |
| Aeruginosins    | Suomilide B                   |                                       | <i>Nostoc sp.</i> KVJ20                        | <i>Blasia pusilla</i> L.                                  |              | 35    |
| Aeruginosins    | Suomilide C                   |                                       | <i>Nostoc sp.</i> KVJ20                        | <i>Blasia pusilla</i> L.                                  |              | 35    |
| Aeruginosins    | Suomilide D                   |                                       | <i>Nostoc sp.</i> KVJ20                        | <i>Blasia pusilla</i> L.                                  |              | 35    |
| Aeruginosins    | Suomilide E                   |                                       | <i>Nostoc sp.</i> KVJ20                        | <i>Blasia pusilla</i> L.                                  |              | 35    |
| Aeruginosins    | Suomilide/Banyaside-like 899  |                                       | <i>Nostoc sp.</i> KVJ18, KVJ20, SKS4           | <i>Blasia pusilla</i> L. (Genotype X, XI, XXIV)           |              | 32    |
| Aeruginosins    | Suomilide/Banyaside-like 927  |                                       | <i>Nostoc sp.</i> KVJ18, KVJ20, SKS4           | <i>Blasia pusilla</i> L. (Genotype X, XI, XXIV)           |              | 32    |
| Aeruginosins    | Suomilide/Banyaside-like 997  |                                       | <i>Nostoc sp.</i> KVJ18, KVJ20, SKS4           | <i>Blasia pusilla</i> L. (Genotype X, XI, XXIV)           |              | 32    |
| Aeruginosins    | Suomilide/Banyaside-like 1045 |                                       | <i>Nostoc sp.</i> KVJ18, KVJ20, SKS4           | <i>Blasia pusilla</i> L. (Genotype X, XI, XXIV)           |              | 32    |
| Aeruginosins    | Suomilide/Banyaside-like 1115 |                                       | <i>Nostoc sp.</i> KVJ18, KVJ20, SKS4           | <i>Blasia pusilla</i> L. (Genotype X, XI, XXIV)           |              | 32    |
| Anabaenopeptins | Anabaenopeptin KVJ811         | CyanoMetDB_2312                       | <i>Nostoc punctiforme</i> KVJ2                 | <i>Blasia pusilla</i> L. (Genotype VI)                    |              | 36    |
| Anabaenopeptins | Anabaenopeptin KVJ827         | CyanoMetDB_2313                       | <i>Nostoc punctiforme</i> KVJ2                 | <i>Blasia pusilla</i> L. (Genotype VI)                    |              | 36    |
| Anabaenopeptins | Anabaenopeptin KVJ841         | CyanoMetDB_2314                       | <i>Nostoc punctiforme</i> KVJ2                 | <i>Blasia pusilla</i> L. (Genotype VI)                    |              | 36    |
| Anabaenopeptins | Anabaenopeptin NZ857          | CyanoMetDB_0715                       | <i>Nostoc punctiforme</i> KVJ2                 | <i>Macrozamia sp.</i>                                     | BGC0001479   | 37–39 |
| Anabaenopeptins | Anabaenopeptin SA9            | CyanoMetDB_2102                       | <i>Nostoc sp.</i> ATCC 53789                   | Unknown Lichen                                            |              | 40    |
| Anabaenopeptins | Anabaenopeptin SA10           | CyanoMetDB_2100                       | <i>Nostoc sp.</i> ATCC 53789                   | Unknown Lichen                                            |              | 40    |
| Anabaenopeptins | Anabaenopeptin SA11           | CyanoMetDB_2101                       | <i>Nostoc sp.</i> ATCC 53789                   | Unknown Lichen                                            |              | 40    |
| Anabaenopeptins | Anabaenopeptin SA12           | CyanoMetDB_2095                       | <i>Nostoc sp.</i> ATCC 53789                   | Unknown Lichen                                            |              | 40    |
| Anabaenopeptins | Schizopeptin 791              | CyanoMetDB_0811                       | <i>Nostoc sp.</i> KVJ20                        | <i>Blasia pusilla</i> L.                                  |              | 35    |
| Alkaloid        | Scytonemin A                  | CyanoMetDB_0332                       | <i>Nostoc punctiforme</i> PCC 73102            | <i>Macrozamia sp.</i>                                     |              | 41    |
| Cryptophycin    | Cryptophycin A                | CyanoMetDB_1104                       | <i>Nostoc sp.</i> ATCC 53789                   | Unknown Lichen                                            | BGC0000975   | 20,42 |
| Cyanobactins    | Ascidiacyclamide              | CyanoMetDB_2655                       | <i>Prochloron didemni</i>                      | <i>Lissoclinum patella</i>                                |              | 43    |
| Cyanobactins    | Bistratamide A                | CyanoMetDB_1361                       | <i>Prochloron didemni</i>                      | <i>Lissoclinum bistratum</i>                              |              | 44    |
| Cyanobactins    | Bistratamide B                | CyanoMetDB_1370                       | <i>Prochloron didemni</i>                      | <i>Lissoclinum bistratum</i>                              |              | 44    |
| Cyanobactins    | Bistratamide C                | CyanoMetDB_1511                       | <i>Prochloron didemni</i>                      | <i>Lissoclinum bistratum</i>                              |              | 45    |
| Cyanobactins    | Bistratamide D                | CyanoMetDB_1440                       | <i>Prochloron didemni</i>                      | <i>Lissoclinum bistratum</i>                              |              | 45    |
| Cyanobactins    | Bistratamide E                | CyanoMetDB_1441                       | <i>Prochloron didemni</i>                      | <i>Lissoclinum bistratum</i>                              |              | 46    |
| Cyanobactins    | Bistratamide F                | CyanoMetDB_1436                       | <i>Prochloron didemni</i>                      | <i>Lissoclinum bistratum</i>                              |              | 46    |
| Cyanobactins    | Bistratamide G                | CyanoMetDB_1443                       | <i>Prochloron didemni</i>                      | <i>Lissoclinum bistratum</i>                              |              | 46    |
| Cyanobactins    | Bistratamide H                | CyanoMetDB_1444                       | <i>Prochloron didemni</i>                      | <i>Lissoclinum bistratum</i>                              |              | 46    |
| Cyanobactins    | Bistratamide I                | CyanoMetDB_1433                       | <i>Prochloron didemni</i>                      | <i>Lissoclinum bistratum</i>                              |              | 46    |
| Cyanobactins    | Bistratamide J                | CyanoMetDB_1434                       | <i>Prochloron didemni</i>                      | <i>Lissoclinum bistratum</i>                              |              | 46    |
| Cyanobactins    | Bistratamide K                | CyanoMetDB_1368                       | <i>Prochloron didemni</i>                      | <i>Lissoclinum bistratum</i>                              |              | 47    |
| Cyanobactins    | Bistratamide L                | CyanoMetDB_1369                       | <i>Prochloron didemni</i>                      | <i>Lissoclinum bistratum</i>                              |              | 47    |
| Cyanobactins    | Bistratamide M                | CyanoMetDB_1538                       | <i>Prochloron didemni</i>                      | <i>Lissoclinum bistratum</i>                              |              | 47    |
| Cyanobactins    | Bistratamide N                | CyanoMetDB_1539                       | <i>Prochloron didemni</i>                      | <i>Lissoclinum bistratum</i>                              |              | 47    |
| Cyanobactins    | Comoramide A                  | CyanoMetDB_2672                       | <i>Prochloron didemni</i>                      | <i>Didemnum molle</i>                                     |              | 48    |
| Cyanobactins    | Comoramide B                  | CyanoMetDB_2673                       | <i>Prochloron didemni</i>                      | <i>Didemnum molle</i>                                     |              | 48    |
| Cyanobactins    | Didmolamide A                 | CyanoMetDB_2641                       | <i>Prochloron didemni</i>                      | <i>Didemnum molle</i>                                     |              | 49    |

|                |                             |                 |                                     |                               |                  |
|----------------|-----------------------------|-----------------|-------------------------------------|-------------------------------|------------------|
| Cyanobactins   | Didmolamide B               | CyanoMetDB_2642 | <i>Prochloron didemni</i>           | <i>Didemnum molle</i>         | 49               |
| Cyanobactins   | Hexamollamide               |                 | <i>Prochloron didemni</i>           | <i>Didemnum molle</i>         | 50               |
| Cyanobactins   | Lissoclinamide 1            | CyanoMetDB_2560 | <i>Prochloron didemni</i>           | <i>Lissoclinum patella</i>    | 51,52            |
| Cyanobactins   | Lissoclinamide 2            | CyanoMetDB_2559 | <i>Prochloron didemni</i>           | <i>Lissoclinum patella</i>    | 51,52            |
| Cyanobactins   | Lissoclinamide 3            | CyanoMetDB_2622 | <i>Prochloron didemni</i>           | <i>Lissoclinum patella</i>    | 51,53            |
| Cyanobactins   | Lissoclinamide 4            |                 | <i>Prochloron didemni</i>           | <i>Lissoclinum patella</i>    | 51,54            |
| Cyanobactins   | Lissoclinamide 5            | CyanoMetDB_2638 | <i>Prochloron didemni</i>           | <i>Lissoclinum patella</i>    | 51,54            |
| Cyanobactins   | Lissoclinamide 6            |                 | <i>Prochloron didemni</i>           | <i>Lissoclinum patella</i>    | 51,53            |
| Cyanobactins   | Lissoclinamide 7            | CyanoMetDB_2668 | <i>Prochloron didemni</i>           | <i>Lissoclinum patella</i>    | 51,55            |
| Cyanobactins   | Lissoclinamide 8            |                 | <i>Prochloron didemni</i>           | <i>Lissoclinum patella</i>    | 51,55            |
| Cyanobactins   | Lissoclinamide 9            | CyanoMetDB_2630 | <i>Prochloron didemni</i>           | <i>Lissoclinum patella</i>    | 56               |
| Cyanobactins   | Lissoclinamide 10           | CyanoMetDB_2631 | <i>Prochloron didemni</i>           | <i>Lissoclinum patella</i>    | 56               |
| Cyanobactins   | Mayotamide A                | CyanoMetDB_2671 | <i>Prochloron didemni</i>           | <i>Didemnum molle</i>         | 48               |
| Cyanobactins   | Mayotamide B                | CyanoMetDB_2670 | <i>Prochloron didemni</i>           | <i>Didemnum molle</i>         | 48               |
| Cyanobactins   | Minimide                    | CyanoMetDB_2581 | <i>Prochloron didemni</i>           | <i>Didemnum molle</i>         | 57               |
| Cyanobactins   | Mollamide A                 | CyanoMetDB_2669 | <i>Prochloron didemni</i>           | <i>Didemnum molle</i>         | 58,59            |
| Cyanobactins   | Mollamide B                 | CyanoMetDB_2603 | <i>Prochloron didemni</i>           | <i>Didemnum molle</i>         | 60               |
| Cyanobactins   | Mollamide C                 | CyanoMetDB_2602 | <i>Prochloron didemni</i>           | <i>Didemnum molle</i>         | 60               |
| Cyanobactins   | Mollamide E                 | CyanoMetDB_2592 | <i>Prochloron didemni</i>           | <i>Didemnum molle</i>         | 61,62            |
| Cyanobactins   | Mollamide F                 | CyanoMetDB_2591 | <i>Prochloron didemni</i>           | <i>Didemnum molle</i>         | 62               |
| Cyanobactins   | Nairaiamide A               | CyanoMetDB_2674 | <i>Prochloron didemni</i>           | <i>Lissoclinum bistratum</i>  | 63               |
| Cyanobactins   | Nairaiamide B               | CyanoMetDB_2675 | <i>Prochloron didemni</i>           | <i>Lissoclinum bistratum</i>  | 63               |
| Cyanobactins   | Patellamide A               | CyanoMetDB_2473 | <i>Prochloron didemni</i>           | <i>Lissoclinum patella</i>    | BGC0000475 64    |
| Cyanobactins   | Patellamide B               | CyanoMetDB_2621 | <i>Prochloron didemni</i>           | <i>Lissoclinum patella</i>    | BGC0000476 65    |
| Cyanobactins   | Patellamide C               | CyanoMetDB_2474 | <i>Prochloron didemni</i>           | <i>Lissoclinum patella</i>    | BGC0000475 64    |
| Cyanobactins   | Patellamide D               | CyanoMetDB_0987 | <i>Prochloron didemni</i>           | <i>Lissoclinum bistratum</i>  | 54               |
| Cyanobactins   | Patellamide E               | CyanoMetDB_2562 | <i>Prochloron didemni</i>           | <i>Lissoclinum patella</i>    | 66               |
| Cyanobactins   | Patellamide F               | CyanoMetDB_2656 | <i>Prochloron didemni</i>           | <i>Lissoclinum patella</i>    | 67               |
| Cyanobactins   | Patellamide G               | CyanoMetDB_2585 | <i>Prochloron didemni</i>           | <i>Lissoclinum patella</i>    | 68               |
| Cyanobactins   | Patellin 1                  | CyanoMetDB_2648 | <i>Prochloron didemni</i>           | <i>Lissoclinum patella</i>    | 69               |
| Cyanobactins   | Patellin 4                  | CyanoMetDB_2649 | <i>Prochloron didemni</i>           | <i>Lissoclinum patella</i>    | 59,69            |
| Cyanobactins   | Patellin 5                  | CyanoMetDB_2652 | <i>Prochloron didemni</i>           | <i>Lissoclinum patella</i>    | 59,69            |
| Cyanobactins   | Patellin 2                  | CyanoMetDB_2651 | <i>Prochloron didemni</i>           | <i>Lissoclinum patella</i>    | BGC0000477 51,69 |
| Cyanobactins   | Patellin 3                  | CyanoMetDB_2653 | <i>Prochloron didemni</i>           | <i>Lissoclinum patella</i>    | BGC0000477 51,69 |
| Cyanobactins   | Patellin 6                  | CyanoMetDB_2654 | <i>Prochloron didemni</i>           | <i>Lissoclinum patella</i>    | BGC0000478 51,69 |
| Cyanobactins   | Prelissoclinamide 2         | CyanoMetDB_2666 | <i>Prochloron didemni</i>           | <i>Lissoclinum patella</i>    | 70               |
| Cyanobactins   | Prepatellin-B-formate       | CyanoMetDB_2667 | <i>Prochloron didemni</i>           | <i>Lissoclinum patella</i>    | 70               |
| Cyanobactins   | Preulithicyclamide          | CyanoMetDB_2665 | <i>Prochloron didemni</i>           | <i>Lissoclinum patella</i>    | 70               |
| Cyanobactins   | Preulithicyclamide          | CyanoMetDB_2575 | <i>Prochloron didemni</i>           | <i>Lissoclinum patella</i>    | 71               |
| Cyanobactins   | Tawicyclamide A             | CyanoMetDB_2623 | <i>Prochloron didemni</i>           | <i>Lissoclinum patella</i>    | 72               |
| Cyanobactins   | Tawicyclamide B             | CyanoMetDB_2624 | <i>Prochloron didemni</i>           | <i>Lissoclinum patella</i>    | 72               |
| Cyanobactins   | Trunkamide A                | CyanoMetDB_2650 | <i>Prochloron didemni</i>           | <i>Lissoclinum patella</i>    | BGC0000478 51,69 |
| Cyanobactins   | Ulithicyclamide             | CyanoMetDB_2590 | <i>Prochloron didemni</i>           | <i>Lissoclinum patella</i>    | 73,74            |
| Cyanobactins   | Ulithicyclamide A           | CyanoMetDB_2589 | <i>Prochloron didemni</i>           | <i>Lissoclinum patella</i>    | 73               |
| Cyanobactins   | Ulithicyclamide B           | CyanoMetDB_2643 | <i>Prochloron didemni</i>           | <i>Lissoclinum patella</i>    | 75               |
| Cyanobactins   | Ulithicyclamide E           | CyanoMetDB_2584 | <i>Prochloron didemni</i>           | <i>Lissoclinum patella</i>    | 68               |
| Cyanobactins   | Ulithicyclamide F           | CyanoMetDB_2582 | <i>Prochloron didemni</i>           | <i>Lissoclinum patella</i>    | 68               |
| Cyanobactins   | Ulithicyclamide G           | CyanoMetDB_2583 | <i>Prochloron didemni</i>           | <i>Lissoclinum patella</i>    | 68               |
| Cyanobactins   | Westiellamide (cyclozoline) | CyanoMetDB_1342 | <i>Prochloron sp.</i>               | <i>Lissoclinum bistratum</i>  | 76               |
| Furanolide     | Nostoclide I                | CyanoMetDB_1570 | <i>Nostoc sp.</i>                   | <i>Peltigera canina</i>       | 77               |
| Furanolide     | Nostoclide II               | CyanoMetDB_1567 | <i>Nostoc sp.</i>                   | <i>Peltigera canina</i>       | 77               |
| Furanolide     | Nostoclide N1               | CyanoMetDB_2427 | <i>Nostoc punctiforme</i> PCC 73102 | <i>Macrozamia sp.</i>         | BGC0002677 78    |
| Furanolide     | Nostoclide N2               | CyanoMetDB_2428 | <i>Nostoc punctiforme</i> PCC 73102 | <i>Macrozamia sp.</i>         | BGC0002677 78    |
| Lanthipeptides | Divamide A                  | CyanoMetDB_2605 | <i>Prochloron didemni</i>           | <i>Didemnum molle</i> E11-036 | BGC0001576 79    |

|                              |                             |                 |                                                                                                        |                                                                                                                           |            |          |
|------------------------------|-----------------------------|-----------------|--------------------------------------------------------------------------------------------------------|---------------------------------------------------------------------------------------------------------------------------|------------|----------|
| Lanthipeptides               | Divamide B                  | CyanoMetDB_2604 | <i>Prochloron didemni</i>                                                                              | <i>Didemnum molle</i> E11-037                                                                                             | BGC0001577 | 79       |
| Lanthipeptides               | Divamide C                  | CyanoMetDB_2678 | <i>Prochloron didemni</i>                                                                              | <i>Didemnum molle</i> E11-037                                                                                             |            | 79       |
| Lipoglycopeptides            | Desmamide A                 | CyanoMetDB_2243 | <i>Desmonostoc muscorum</i> LEGE 12446                                                                 | <i>Cycas revoluta</i>                                                                                                     | BGC0002625 | 2        |
| Lipoglycopeptides            | Desmamide B                 | CyanoMetDB_2244 | <i>Desmonostoc muscorum</i> LEGE 12446                                                                 | <i>Cycas revoluta</i>                                                                                                     | BGC0002625 | 2        |
| Lipoglycopeptides            | Desmamide C                 | CyanoMetDB_2245 | <i>Desmonostoc muscorum</i> LEGE 12446                                                                 | <i>Cycas revoluta</i>                                                                                                     | BGC0002625 | 2        |
| Microviridin                 | Microviridin N3             | CyanoMetDB_2174 | <i>Nostoc punctiforme</i> PCC 73102                                                                    | <i>Macrozamia</i> sp.                                                                                                     | BGC0002049 | 37       |
| Microviridin                 | Microviridin N4             | CyanoMetDB_2173 | <i>Nostoc punctiforme</i> PCC 73102                                                                    | <i>Macrozamia</i> sp.                                                                                                     | BGC0002049 | 37       |
| Microviridin                 | Microviridin N5             | CyanoMetDB_2172 | <i>Nostoc punctiforme</i> PCC 73102                                                                    | <i>Macrozamia</i> sp.                                                                                                     | BGC0002049 | 37       |
| Microviridin                 | Microviridin N6             | CyanoMetDB_2171 | <i>Nostoc punctiforme</i> PCC 73102                                                                    | <i>Macrozamia</i> sp.                                                                                                     | BGC0002049 | 37       |
| Microviridin                 | Microviridin N7             | CyanoMetDB_2170 | <i>Nostoc punctiforme</i> PCC 73102                                                                    | <i>Macrozamia</i> sp.                                                                                                     | BGC0002049 | 37       |
| Microviridin                 | Microviridin N8             | CyanoMetDB_2169 | <i>Nostoc punctiforme</i> PCC 73102                                                                    | <i>Macrozamia</i> sp.                                                                                                     | BGC0002049 | 37       |
| Microviridin                 | Microviridin N9             | CyanoMetDB_2168 | <i>Nostoc punctiforme</i> PCC 73102                                                                    | <i>Macrozamia</i> sp.                                                                                                     | BGC0002049 | 37       |
| Mycosporine-like amino acids | Asterina 330                | CyanoMetDB_1724 | Unknown<br>Unknown                                                                                     | <i>Lobaria retigera</i><br><i>Stereocaulon foliolosum</i>                                                                 |            | 80       |
| Mycosporine-like amino acids | mycosporine-glu-gly         | CyanoMetDB_1690 | <i>Hormoscilla spongelliae</i><br>Unknown<br>Unknown                                                   | <i>Lamellodysidea herbacea</i><br><i>Lobaria retigera</i><br><i>Peltigera polydactylon</i>                                |            | 80,81    |
| Mycosporine-like amino acids | Mycosporine-glycine         | CyanoMetDB_1770 | <i>Hormoscilla spongelliae</i><br><i>Prochloron</i> sp.<br>Unknown<br>Unknown                          | <i>Lamellodysidea herbacea</i><br><i>Lissoclinium patella</i><br><i>Lobaria retigera</i><br><i>Peltigera polydactylon</i> |            | 80,81    |
| Mycosporine-like amino acids | Mycosporine-glycine-valine  | CyanoMetDB_1687 | Unknown                                                                                                | <i>Lobaria retigera</i>                                                                                                   |            | 80       |
| Mycosporine-like amino acids | Mycosporine taurine         | CyanoMetDB_1753 | Unknown<br>Unknown<br>Unknown                                                                          | <i>Lobaria retigera</i><br><i>Stereocaulon foliolosum</i><br><i>Peltigera polydactylon</i>                                |            | 80       |
| Mycosporine-like amino acids | Palythene                   | CyanoMetDB_1711 | <i>Hormoscilla spongelliae</i><br>Unknown<br>Unknown<br>Unknown                                        | <i>Dysidea herbacea</i><br><i>Lobaria retigera</i><br><i>Stereocaulon foliolosum</i><br><i>Peltigera polydactylon</i>     |            | 80,81    |
| Mycosporine-like amino acids | Palythine                   | CyanoMetDB_1769 | Unknown<br>Unknown<br>Unknown                                                                          | <i>Lobaria retigera</i><br><i>Stereocaulon foliolosum</i><br><i>Peltigera polydactylon</i>                                |            | 80       |
| Mycosporine-like amino acids | Palythinol                  | CyanoMetDB_1709 | Unknown                                                                                                | <i>Lobaria retigera</i>                                                                                                   |            | 80       |
| Mycosporine-like amino acids | Shinorine                   | CyanoMetDB_1710 | <i>N. punctiforme</i> PCC 73102<br><i>Hormoscilla spongelliae</i> GUM007, GUM202<br>Unknown<br>Unknown | <i>Macrozamia</i> sp.<br><i>Lamellodysidea herbacea</i><br><i>Lobaria retigera</i><br><i>Peltigera polydactylon</i>       |            | 30,80,82 |
| Mycosporine-like amino acids | Usujirene                   |                 | <i>Hormoscilla spongelliae</i>                                                                         | <i>Lamellodysidea herbacea</i>                                                                                            |            | 81       |
| Nostocyclopeptides           | Nostopeptolide 1052         | CyanoMetDB_2175 | <i>Nostoc punctiforme</i> PCC 73102                                                                    | <i>Macrozamia</i> sp.                                                                                                     | BGC0002061 | 37       |
| Nostocyclopeptides           | Nostocyclopeptide A1        | CyanoMetDB_1006 | <i>Nostoc</i> sp. ATCC 53789;<br><i>Nostoc</i> sp. KVJ4, KVJ20                                         | Unknown Lichen;<br><i>Blasia pusilla</i> L. (Genotype VIII, XI)                                                           | BGC0000397 | 32,83    |
| Nostocyclopeptides           | Nostocyclopeptide A2        | CyanoMetDB_0923 | <i>Nostoc</i> sp. ATCC 53789;                                                                          | Unknown Scottish Lichen                                                                                                   | BGC0000397 | 32,83    |
| Nostocyclopeptides           | Nostocyclopeptide A3        | CyanoMetDB_0873 | <i>Nostoc</i> sp. ATCC 53789;                                                                          | Unknown Scottish Lichen                                                                                                   | BGC0000397 | 32,83    |
| Nostopeptolide               | Nostopeptolide A1           | CyanoMetDB_0439 | <i>Nostoc punctiforme</i> PCC 73102                                                                    | <i>Macrozamia</i> sp.                                                                                                     | BGC0002061 | 37,84    |
| Nostophycins                 | Nostophycin                 | CyanoMetDB_0658 | <i>Nostoc</i> sp. SKS8                                                                                 | <i>Blasia pusilla</i> L. (Genotype XVIII)                                                                                 |            | 32       |
|                              | Nostovalerolactone          | CyanoMetDB_2429 | <i>Nostoc punctiforme</i> PCC 73102                                                                    | <i>Macrozamia</i> sp.                                                                                                     | BGC0002711 | 78       |
|                              | 9-Dehydronostovalerolactone | CyanoMetDB_2430 | <i>Nostoc punctiforme</i> PCC 73102                                                                    | <i>Macrozamia</i> sp.                                                                                                     | BGC0002711 | 78       |
|                              | Nostamide A                 | CyanoMetDB_0710 | <i>Nostoc punctiforme</i> PCC 73102                                                                    | <i>Macrozamia</i> sp.                                                                                                     | BGC0001479 | 36,39    |
| Pederins                     | Nosperin                    | CyanoMetDB_1378 | <i>Nostoc</i> sp. N6<br><i>Nostoc</i> sp. KVJ10                                                        | <i>Peltigera membranacea</i><br><i>Blasia pusilla</i> L. (Genotype IX)                                                    | BGC0001071 | 85       |
| Peptide hepatotoxins         | [DMAdda5]MC-LR              | CyanoMetDB_1788 | <i>Nostoc</i> sp. IO-102-I<br>Unknown                                                                  | <i>Pannaria pezizoides</i><br><i>Peltigera dolichorhiza</i>                                                               |            | 86       |
| Peptide hepatotoxins         | [ADMAdda5]MC-LR             | CyanoMetDB_1909 | <i>Nostoc</i> sp. IO-102-I                                                                             | <i>Pannaria pezizoides</i>                                                                                                |            | 86       |

|                      |                                             |                 |                                                                                                            |                                                                                                                                                         |                  |
|----------------------|---------------------------------------------|-----------------|------------------------------------------------------------------------------------------------------------|---------------------------------------------------------------------------------------------------------------------------------------------------------|------------------|
|                      |                                             |                 | Unknown                                                                                                    | <i>Peltigera dolichorhiza</i>                                                                                                                           |                  |
| Peptide hepatotoxins | [ADMAAdda5]MC-YR                            | CyanoMetDB_2044 | <i>Nostoc</i> sp. IO-102-I                                                                                 | <i>Pannaria pezizoides</i>                                                                                                                              | 86               |
| Peptide hepatotoxins | [D-Asp <sup>3</sup> ,ADMAAdda5]MC-LR        | CyanoMetDB_1975 | <i>Nostoc</i> sp. IO-102-I<br>Unknown                                                                      | <i>Pannaria pezizoides</i><br><i>Lobaria scrobiculata</i><br><i>Peltigera leucophlebia</i>                                                              | 86               |
| Peptide hepatotoxins | [DMAdda5]MC-HiIR                            | CyanoMetDB_1850 | <i>Nostoc</i> sp. IO-102-I                                                                                 | <i>Pannaria pezizoides</i>                                                                                                                              | 86               |
| Peptide hepatotoxins | [DMAdda5]MC-(H4)YR                          | CyanoMetDB_1949 | <i>Nostoc</i> sp. UK18                                                                                     | <i>Peltigera leucophlebia</i>                                                                                                                           | 87               |
| Peptide hepatotoxins | [DMAdda5]MC-FR                              | CyanoMetDB_1901 | <i>Nostoc</i> sp. UK18                                                                                     | <i>Peltigera leucophlebia</i>                                                                                                                           | 87               |
| Peptide hepatotoxins | [ADMAAdda5]MC-(H4)YHar                      | CyanoMetDB_2060 | <i>Nostoc</i> sp. UK18                                                                                     | <i>Peltigera leucophlebia</i>                                                                                                                           | 87               |
| Peptide hepatotoxins | [ADMAAdda5]MC-(H4)YR                        | CyanoMetDB_2051 | <i>Nostoc</i> sp. UK18                                                                                     | <i>Peltigera leucophlebia</i>                                                                                                                           | 87               |
| Peptide hepatotoxins | [ADMAAdda5]MC-FR                            | CyanoMetDB_2012 | <i>Nostoc</i> sp. UK18                                                                                     | <i>Peltigera leucophlebia</i>                                                                                                                           | 87               |
| Peptide hepatotoxins | [D-Asp <sup>3</sup> ,ADMAAdda5]MC-(H4)YR    | CyanoMetDB_2023 | <i>Nostoc</i> sp. UK18                                                                                     | <i>Peltigera leucophlebia</i>                                                                                                                           | 87               |
| Peptide hepatotoxins | [D-Asp <sup>3</sup> ,DMAAdda5]MC-LR         | CyanoMetDB_1806 | <i>Nostoc</i> sp. UK18<br>Unknown                                                                          | <i>Peltigera leucophlebia</i><br><i>Nephroma laevigatum</i>                                                                                             | 87               |
| Peptide hepatotoxins | [ADMAAdda5]MC-RHar                          | CyanoMetDB_2054 | Unknown                                                                                                    | <i>Nephroma parile</i>                                                                                                                                  | 88               |
| Peptide hepatotoxins | [ADMAAdda5]MC-RR                            | CyanoMetDB_2075 | Unknown<br>Unknown<br>Unknown<br>Unknown                                                                   | <i>Nephroma parile</i><br><i>Peltigera hymenina</i><br><i>Peltigera collina</i><br><i>Peltigera leucophlebia</i><br><i>Peltigera praetextata</i>        | 88               |
| Peptide hepatotoxins | [D-Asp <sup>3</sup> ,ADMAAdda5]MC-HphR      | CyanoMetDB_2013 | Unknown<br>Unknown<br>Unknown                                                                              | <i>Peltigera praetextata</i><br><i>Peltigera membranacea</i><br><i>Peltigera hymenina</i>                                                               | 88               |
| Peptide hepatotoxins | [D-Asp <sup>3</sup> ,ADMAAdda5]MC-RR        | CyanoMetDB_1998 | Unknown<br>Unknown<br>Unknown<br>Unknown                                                                   | <i>Nephroma parile</i><br><i>Peltigera praetextata</i><br><i>Peltigera membranacea</i><br><i>Peltigera hymenina</i><br><i>Peltigera leucophlebia</i>    | 88               |
| Peptide hepatotoxins | [D-Leu1,ADMAAdda5]MC-LHar                   | CyanoMetDB_2053 | Unknown                                                                                                    | <i>Peltigera</i> sp.                                                                                                                                    | 88               |
| Peptide hepatotoxins | [D-Leu1,ADMAAdda5]MC-LR                     | CyanoMetDB_2028 | Unknown<br>Unknown<br>Unknown                                                                              | <i>Nephroma cellulolum</i><br><i>Peltigera evansiana</i><br><i>Peltigera</i> sp.                                                                        | 88               |
| Peptide hepatotoxins | [D-Leu1,D-Asp <sup>3</sup> ,ADMAAdda5]MC-LR | CyanoMetDB_1989 | Unknown<br>Unknown                                                                                         | <i>Nephroma cellulolum</i><br><i>Peltigera evansiana</i>                                                                                                | 88               |
| Peptide hepatotoxins | [D-Leu1,D-Asp <sup>3</sup> ,DMAAdda5]MC-LR  | CyanoMetDB_1882 | Unknown                                                                                                    | <i>Peltigera degenii</i>                                                                                                                                | 88               |
| Peptide hepatotoxins | [D-Leu1,D-Asp <sup>3</sup> ]MC-HphR         | CyanoMetDB_2038 | Unknown                                                                                                    | <i>Peltigera degenii</i>                                                                                                                                | 88               |
| Peptide hepatotoxins | [D-Leu1,D-Asp <sup>3</sup> ]MC-LR           | CyanoMetDB_1834 | Unknown                                                                                                    | <i>Peltigera degenii</i>                                                                                                                                | 88               |
| Peptide hepatotoxins | [D-Leu1]MC-HtyR                             | CyanoMetDB_2062 | Unknown<br><i>Nostoc</i> sp. UK92.II                                                                       | <i>Peltigera membranacea</i><br><i>Peltigera degenii</i>                                                                                                | 88               |
| Peptide hepatotoxins | [D-Leu1]MC-LHar                             | CyanoMetDB_1992 | Unknown                                                                                                    | <i>Peltigera evansiana</i>                                                                                                                              | 88               |
| Peptide hepatotoxins | [D-Asp <sup>3</sup> ]MC-RR                  | CyanoMetDB_1941 | Unknown                                                                                                    | <i>Sticta fuliginosa</i>                                                                                                                                | 88               |
| Peptide hepatotoxins | MC-RR                                       | CyanoMetDB_1802 | Unknown                                                                                                    | <i>Sticta fuliginosa</i>                                                                                                                                | 88               |
| Peptide hepatotoxins | [D-Leu1]MC-LR                               | CyanoMetDB_1997 | Unknown<br><i>Nostoc</i> sp. UK222.Ib<br>Unknown<br><i>Nostoc</i> sp. UK89.II<br><i>Nostoc</i> sp. UK92.II | <i>Peltigera evansiana</i><br><i>Peltigera degenii</i><br><i>Peltigera evansiana</i><br><i>Peltigera neopolydactyla</i><br><i>Peltigera membranacea</i> | 88               |
| Peptide hepatotoxins | Nodularin R                                 | CyanoMetDB_0861 | <i>Nostoc</i> sp. 73.1<br><i>Nostoc</i> sp. 65.1<br>Unknown<br>Unknown                                     | <i>Macrozamia serpentine</i><br><i>Macrozamia riedlei</i><br><i>Sticta</i> sp.<br><i>Peltigera dolichorhiza</i>                                         | BGC0000396 88,89 |
| Peptide hepatotoxins | [L-Harb] Nodularin                          | CyanoMetDB_0800 | <i>Nostoc</i> sp. 73.1<br><i>Nostoc</i> sp. 65.1<br><i>Nostoc</i> sp. KVJ1, KVJ3, SKS1                     | <i>Macrozamia serpentine</i><br><i>Macrozamia riedlei</i><br><i>Blasia pusilla</i> L. (Genotype I, VII, XIV)                                            | BGC0000396 88,89 |

|                               |                                                           |                 |                                                                                                    |                                                            |                  |
|-------------------------------|-----------------------------------------------------------|-----------------|----------------------------------------------------------------------------------------------------|------------------------------------------------------------|------------------|
| Polybrominated diethyl ethers | 2'-Hydroxy-2,3',4,5'-tetrabromodiphenyl ether             | CyanoMetDB_2636 | <i>Hormoscilla spongelliae</i> GUM020 (clade Ib)                                                   | <i>Lamellodysidea herbacea</i>                             | 90               |
| Polybrominated diethyl ethers | 6-Hydroxy-2,2',4,4'-tetrabromodiphenyl ether              | CyanoMetDB_2637 | <i>Hormoscilla spongelliae</i> GUM020 (clade Ib)<br><i>Hormoscilla spongelliae</i> SP4 (clade IV)  | <i>Lamellodysidea herbacea</i><br><i>Dysidea granulosa</i> | 90               |
| Polybrominated diethyl ethers | 3,6-dibromo-2-(5-bromo-2-hydroxyphenoxy)phenol            | CyanoMetDB_2576 | <i>Hormoscilla spongelliae</i> GUM202 (clade II)                                                   | <i>Lamellodysidea herbacea</i>                             | 30               |
| Polybrominated diethyl ethers | 3,6-Dibromo-2-(3,5-dibromo-2-hydroxyphenoxy)phenol        | CyanoMetDB_2644 | <i>Hormoscilla spongelliae</i> GUM202 (clade II)                                                   | <i>Lamellodysidea herbacea</i>                             | 30               |
| Polybrominated diethyl ethers | 3,5-dibromo-2-(3,5-dibromo-2-methoxyphenoxy)phenol        | CyanoMetDB_2588 | <i>Hormoscilla spongelliae</i> SP12 (clade Ia)<br><i>Hormoscilla spongelliae</i> GUM202 (clade II) | <i>Lamellodysidea herbacea</i>                             | 30,90            |
| Polybrominated diethyl ethers | 2,3,5-Tribromo-6-(3,5-dibromo-2-hydroxyphenoxy)phenol     | CyanoMetDB_2635 | <i>Hormoscilla spongelliae</i> GUM202 (clade II)                                                   | <i>Lamellodysidea herbacea</i>                             | 30               |
| Polybrominated diethyl ethers | 2,3,5-tribromo-6-(3,5-dibromo-2-methoxyphenoxy)phenol     | CyanoMetDB_2646 | <i>Hormoscilla spongelliae</i> GUM202 (clade II)                                                   | <i>Lamellodysidea herbacea</i>                             | 30               |
| Polybrominated diethyl ethers | 3,4,5-tribromo-2-(3,5-dibromo-2-hydroxyphenoxy)phenol     | CyanoMetDB_2657 | <i>Hormoscilla spongelliae</i> GUM202 (clade II)                                                   | <i>Lamellodysidea herbacea</i>                             | 30               |
| Polybrominated diethyl ethers | 3,4,5-tribromo-2-(3,5-dibromo-2-methoxyphenoxy)phenol     | CyanoMetDB_2658 | <i>Hormoscilla spongelliae</i> GUM202 (clade II)                                                   | <i>Lamellodysidea herbacea</i>                             | 30               |
| Polybrominated diethyl ethers | 3,4,6-Tribromo-2-(3,5-dibromo-2-hydroxyphenoxy)phenol     | CyanoMetDB_2561 | <i>Hormoscilla spongelliae</i> GUM202 (clade II)                                                   | <i>Lamellodysidea herbacea</i>                             | 30               |
| Polybrominated diethyl ethers | 2,3,4,5-Tetrabromo-6-(3,5-dibromo-2-hydroxyphenoxy)phenol | CyanoMetDB_2634 | <i>Hormoscilla spongelliae</i> GUM202 (clade II)                                                   | <i>Lamellodysidea herbacea</i>                             | 30               |
| Polybrominated diethyl ethers | 2,3,4,5-Tetrabromo-6-(3,5-dibromo-2-methoxyphenoxy)phenol | CyanoMetDB_2645 | <i>Hormoscilla spongelliae</i> GUM202 (clade II)                                                   | <i>Lamellodysidea herbacea</i>                             | 30               |
| Polychlorinated leucines      | 10-Dechlorodysideathiazole                                | CyanoMetDB_2660 | <i>Hormoscilla spongelliae</i>                                                                     | <i>Lamellodysidea herbacea</i>                             | 91               |
| Polychlorinated leucines      | 10-dechloro- <i>N</i> -methylidysideathiazole             | CyanoMetDB_2662 | <i>Hormoscilla spongelliae</i>                                                                     | <i>Lamellodysidea herbacea</i>                             | 91               |
| Polychlorinated leucines      | 11-Dechloro-13-demethylisodysidenine                      | CyanoMetDB_2608 | <i>Hormoscilla spongelliae</i>                                                                     | <i>Lamellodysidea herbacea</i>                             | 92               |
| Polychlorinated leucines      | 13-demethylidysidenin                                     | CyanoMetDB_2609 | <i>Hormoscilla spongelliae</i>                                                                     | <i>Lamellodysidea herbacea</i>                             | 92               |
| Polychlorinated leucines      | 13-demethylisodysidenin                                   | CyanoMetDB_2610 | <i>Hormoscilla spongelliae</i>                                                                     | <i>Lamellodysidea herbacea</i>                             | 92               |
| Polychlorinated leucines      | 2,3-Dihydrodysamide C                                     | CyanoMetDB_2632 | <i>Hormoscilla spongelliae</i>                                                                     | <i>Lamellodysidea herbacea</i>                             | 93               |
| Polychlorinated leucines      | 5-Epidysidamide G                                         | CyanoMetDB_2593 | <i>Hormoscilla spongelliae</i>                                                                     | <i>Lamellodysidea herbacea</i>                             | 94               |
| Polychlorinated leucines      | 9,10-didechloro- <i>N</i> -methylidysideathiazole         | CyanoMetDB_2663 | <i>Hormoscilla spongelliae</i>                                                                     | <i>Lamellodysidea herbacea</i>                             | 91               |
| Polychlorinated leucines      | Barbaleucamide A                                          | CyanoMetDB_1683 | <i>Hormoscilla spongelliae</i>                                                                     | <i>Lamellodysidea herbacea</i>                             | 95               |
| Polychlorinated leucines      | Barbaleucamide B                                          | CyanoMetDB_2639 | <i>Hormoscilla spongelliae</i>                                                                     | <i>Lamellodysidea herbacea</i>                             | 95               |
| Polychlorinated leucines      | Callyspongiamide A                                        | CyanoMetDB_2557 | Unknown                                                                                            | <i>Callyspongia</i> sp.                                    | 96               |
| Polychlorinated leucines      | Callyspongiamide B                                        | CyanoMetDB_2556 | Unknown                                                                                            | <i>Callyspongia</i> sp.                                    | 96               |
| Polychlorinated leucines      | Didechlorodihydrodysamide C                               | CyanoMetDB_2606 | <i>Hormoscilla spongelliae</i>                                                                     | <i>Lamellodysidea herbacea</i>                             | 97,98            |
| Polychlorinated leucines      | Dihydrodysamide C                                         | CyanoMetDB_2607 | Unknown                                                                                            | <i>Dysidea fragilis</i>                                    | 92,94,99<br>-101 |
|                               |                                                           |                 | Unknown                                                                                            | <i>Dysidea herbacea</i>                                    |                  |
|                               |                                                           |                 | Unknown                                                                                            | <i>Dysidea chlorea</i>                                     |                  |
| Polychlorinated leucines      | Dysamide A                                                | CyanoMetDB_2554 | Unknown                                                                                            | <i>Lamellodysidea herbacea</i>                             | 94,96,99<br>-101 |
|                               |                                                           |                 | Unknown                                                                                            | <i>Dysidea fragilis</i>                                    |                  |
|                               |                                                           |                 | Unknown                                                                                            | <i>Dysidea chlorea</i>                                     |                  |
| Polychlorinated leucines      | Dysamide B                                                | CyanoMetDB_2555 | Unknown                                                                                            | <i>Callyspongia</i> sp.                                    | 99-101           |
|                               |                                                           |                 | Unknown                                                                                            | <i>Lamellodysidea herbacea</i>                             |                  |
| Polychlorinated leucines      | Dysamide C                                                | CyanoMetDB_2553 | Unknown                                                                                            | <i>Dysidea fragilis</i>                                    | 99-101           |
|                               |                                                           |                 | Unknown                                                                                            | <i>Dysidea chlorea</i>                                     |                  |



|                          |                                                                                                  |                 |                                                     |                                                                                     |            |
|--------------------------|--------------------------------------------------------------------------------------------------|-----------------|-----------------------------------------------------|-------------------------------------------------------------------------------------|------------|
| Polychlorinated leucines | Dysamide D                                                                                       | CyanoMetDB_2613 | Unknown<br>Unknown<br><i>Hormoscilla spongeliae</i> | <i>Dysidea fragilis</i><br><i>Dysidea chlorea</i><br><i>Lamellodysidea herbacea</i> | 94,100,101 |
| Polychlorinated leucines | Dysamide E                                                                                       |                 | Unknown<br><i>Hormoscilla spongeliae</i>            | <i>Dysidea chlorea</i><br><i>Lamellodysidea herbacea</i>                            | 94,101     |
| Polychlorinated leucines | Dysamide I                                                                                       | CyanoMetDB_2564 | Unknown                                             | <i>Dysidea chlorea</i>                                                              | 101        |
| Polychlorinated leucines | Dysamide J                                                                                       | CyanoMetDB_2563 | Unknown                                             | <i>Dysidea chlorea</i>                                                              | 101        |
| Polychlorinated leucines | Dysamide K                                                                                       | CyanoMetDB_2570 | Unknown                                             | <i>Dysidea chlorea</i>                                                              | 101        |
| Polychlorinated leucines | Dysamide L                                                                                       | CyanoMetDB_2571 | Unknown                                             | <i>Dysidea chlorea</i>                                                              | 101        |
| Polychlorinated leucines | Dysamide M                                                                                       | CyanoMetDB_2573 | Unknown                                             | <i>Dysidea chlorea</i>                                                              | 101        |
| Polychlorinated leucines | Dysamide N                                                                                       | CyanoMetDB_2572 | Unknown                                             | <i>Dysidea chlorea</i>                                                              | 101        |
| Polychlorinated leucines | Dysamide O                                                                                       | CyanoMetDB_2565 | Unknown                                             | <i>Dysidea chlorea</i>                                                              | 101        |
| Polychlorinated leucines | Dysamide P                                                                                       | CyanoMetDB_2574 | Unknown                                             | <i>Dysidea chlorea</i>                                                              | 101        |
| Polychlorinated leucines | Dysamide Q                                                                                       | CyanoMetDB_2566 | Unknown                                             | <i>Dysidea chlorea</i>                                                              | 101        |
| Polychlorinated leucines | Dysamide R                                                                                       | CyanoMetDB_2567 | Unknown                                             | <i>Dysidea chlorea</i>                                                              | 101        |
| Polychlorinated leucines | Dysamide S                                                                                       | CyanoMetDB_2568 | Unknown                                             | <i>Dysidea chlorea</i>                                                              | 101        |
| Polychlorinated leucines | Dysamide T                                                                                       | CyanoMetDB_2569 | Unknown                                             | <i>Dysidea chlorea</i>                                                              | 101        |
| Polychlorinated leucines | Dysamide U                                                                                       | CyanoMetDB_2676 | Unknown                                             | <i>Dysidea</i> sp.                                                                  | 102        |
| Polychlorinated leucines | Dysidamide A                                                                                     | CyanoMetDB_2586 | <i>Hormoscilla spongeliae</i>                       | <i>Lamellodysidea herbacea</i>                                                      | 94,103     |
| Polychlorinated leucines | Dysidamide B                                                                                     | CyanoMetDB_2612 | <i>Hormoscilla spongeliae</i>                       | <i>Lamellodysidea herbacea</i>                                                      | 94,104     |
| Polychlorinated leucines | Dysidamide C                                                                                     | CyanoMetDB_2611 | <i>Hormoscilla spongeliae</i>                       | <i>Lamellodysidea herbacea</i>                                                      | 94,104     |
| Polychlorinated leucines | Dysidamide D                                                                                     | CyanoMetDB_2597 | <i>Hormoscilla spongeliae</i>                       | <i>Lamellodysidea herbacea</i>                                                      | 94         |
| Polychlorinated leucines | Dysidamide E                                                                                     | CyanoMetDB_2598 | <i>Hormoscilla spongeliae</i>                       | <i>Lamellodysidea herbacea</i>                                                      | 94         |
| Polychlorinated leucines | Dysidamide F                                                                                     | CyanoMetDB_2595 | <i>Hormoscilla spongeliae</i>                       | <i>Lamellodysidea herbacea</i>                                                      | 94         |
| Polychlorinated leucines | Dysidamide G                                                                                     | CyanoMetDB_2594 | <i>Hormoscilla spongeliae</i>                       | <i>Lamellodysidea herbacea</i>                                                      | 94         |
| Polychlorinated leucines | Dysidamide H                                                                                     | CyanoMetDB_2596 | <i>Hormoscilla spongeliae</i>                       | <i>Lamellodysidea herbacea</i>                                                      | 94         |
| Polychlorinated leucines | Dysideaprolin A                                                                                  | CyanoMetDB_1611 | <i>Hormoscilla spongeliae</i>                       | <i>Lamellodysidea herbacea</i>                                                      | 95         |
| Polychlorinated leucines | Dysideaprolin B                                                                                  | CyanoMetDB_1584 | <i>Hormoscilla spongeliae</i>                       | <i>Lamellodysidea herbacea</i>                                                      | 95         |
| Polychlorinated leucines | Dysideaprolin C                                                                                  | CyanoMetDB_1643 | <i>Hormoscilla spongeliae</i>                       | <i>Lamellodysidea herbacea</i>                                                      | 95         |
| Polychlorinated leucines | Dysideaprolin D                                                                                  | CyanoMetDB_1604 | <i>Hormoscilla spongeliae</i>                       | <i>Lamellodysidea herbacea</i>                                                      | 95         |
| Polychlorinated leucines | Dysideaprolin E                                                                                  | CyanoMetDB_1605 | <i>Hormoscilla spongeliae</i>                       | <i>Lamellodysidea herbacea</i>                                                      | 95         |
| Polychlorinated leucines | Dysideaprolin F                                                                                  | CyanoMetDB_1608 | <i>Hormoscilla spongeliae</i>                       | <i>Lamellodysidea herbacea</i>                                                      | 95         |
| Polychlorinated leucines | Dysideapyrrolidone                                                                               | CyanoMetDB_2664 | <i>Hormoscilla spongeliae</i>                       | <i>Lamellodysidea herbacea</i>                                                      | 91         |
| Polychlorinated leucines | Dysideathiazole                                                                                  | CyanoMetDB_2659 | <i>Hormoscilla spongeliae</i>                       | <i>Lamellodysidea herbacea</i>                                                      | 91,105     |
| Polychlorinated leucines | Dysidenin                                                                                        | CyanoMetDB_2619 | <i>Hormoscilla spongeliae</i>                       | <i>Lamellodysidea herbacea</i>                                                      | 106        |
| Polychlorinated leucines | Dysidin                                                                                          | CyanoMetDB_2647 | <i>Hormoscilla spongeliae</i>                       | <i>Lamellodysidea herbacea</i>                                                      | 107        |
| Polychlorinated leucines | Herbamide A                                                                                      | CyanoMetDB_2601 | <i>Hormoscilla spongeliae</i>                       | <i>Lamellodysidea herbacea</i>                                                      | 108        |
| Polychlorinated leucines | Isodysidenin                                                                                     | CyanoMetDB_2633 | <i>Hormoscilla spongeliae</i>                       | <i>Lamellodysidea herbacea</i>                                                      | 109        |
| Polychlorinated leucines | Neodysidenin                                                                                     | CyanoMetDB_2640 | <i>Hormoscilla spongeliae</i>                       | <i>Lamellodysidea herbacea</i>                                                      | 110        |
| Polychlorinated leucines | N-methyldysideathiazole                                                                          | CyanoMetDB_2661 | <i>Hormoscilla spongeliae</i>                       | <i>Lamellodysidea herbacea</i>                                                      | 91         |
| Polychlorinated leucines | O-Acetyldysidamide                                                                               | CyanoMetDB_2587 | <i>Hormoscilla spongeliae</i>                       | <i>Lamellodysidea herbacea</i>                                                      | 103        |
| Polychlorinated leucines | Sintokamide A                                                                                    | CyanoMetDB_2615 | Unknown                                             | <i>Dysidea</i> sp.                                                                  | 111        |
| Polychlorinated leucines | Sintokamide B                                                                                    | CyanoMetDB_2614 | Unknown                                             | <i>Dysidea</i> sp.                                                                  | 111        |
| Polychlorinated leucines | Sintokamide C                                                                                    | CyanoMetDB_2616 | Unknown                                             | <i>Dysidea</i> sp.                                                                  | 111        |
| Polychlorinated leucines | Sintokamide D                                                                                    | CyanoMetDB_2617 | Unknown                                             | <i>Dysidea</i> sp.                                                                  | 111        |
| Polychlorinated leucines | Sintokamide E                                                                                    | CyanoMetDB_2618 | Unknown                                             | <i>Dysidea</i> sp.                                                                  | 111        |
| Polychlorinated leucines | D-Leucine, 5,5-dichloro-N-[(3S)-4,4-dichloro-3-methyl-1-oxobutyl]-N-methyl-, methyl ester, (4S)- | CyanoMetDB_2629 | Unknown                                             | <i>Dysidea</i> sp.                                                                  | 112        |
| Polychlorinated leucines | D-Leucine, 5,5,5-trichloro-N-methyl-N-[(3S)-4,4,4-trichloro-3-methyl-1-oxobutyl]-, (4S)-         | CyanoMetDB_2625 | Unknown                                             | <i>Dysidea</i> sp.                                                                  | 112        |

|                          |                                                                                                                            |                 |                                     |                                |                |
|--------------------------|----------------------------------------------------------------------------------------------------------------------------|-----------------|-------------------------------------|--------------------------------|----------------|
| Polychlorinated leucines | L-Leucine, 5,5,5-trichloro-N-methyl-N-[(3S)-4,4,4-trichloro-3-methyl-1-oxobutyl]-, (4S)-                                   | CyanoMetDB_2626 | Unknown                             | <i>Dysidea</i> sp.             | 112            |
| Polychlorinated leucines | D-Leucine, 5,5,5-trichloro-N-methyl-N-[(3S)-4,4,4-trichloro-3-methyl-1-oxobutyl]-, methyl ester, (4S)-                     | CyanoMetDB_2627 | Unknown                             | <i>Dysidea</i> sp.             | 112            |
| Polychlorinated leucines | L-Leucine, 5,5,5-trichloro-N-methyl-N-[(3S)-4,4,4-trichloro-3-methyl-1-oxobutyl]-, methyl ester, (4S)-                     | CyanoMetDB_2628 | Unknown                             | <i>Dysidea</i> sp.             | 112            |
| Polychlorinated leucines | Methyl (4S,6S)-7,7,7-trichloro-2,2,6-trimethyl-3-oxo-4-[[[(3S)-4,4,4-trichloro-3-methyl-1-oxobutyl]amino]heptanoate        | CyanoMetDB_2599 | <i>Hormoscilla spongelliae</i>      | <i>Lamellodysidea herbacea</i> | 94             |
| Polychlorinated leucines | Methyl (3S,4S,6S)-7,7,7-trichloro-3-hydroxy-2,2,6-trimethyl-4-[[[(3S)-4,4,4-trichloro-3-methyl-1-oxobutyl]amino]heptanoate | CyanoMetDB_2600 | <i>Hormoscilla spongelliae</i>      | <i>Lamellodysidea herbacea</i> | 94             |
| Terpene                  | Geosmin                                                                                                                    |                 | <i>Nostoc punctiforme</i> PCC 73102 | <i>Macrozamia</i> sp.          | BGC0000661 113 |

\* CyanoMetDB version 2.0: includes further references and structural information for each compound and can be found at: <https://zenodo.org/record/7922070>

§ The MiBIG database<sup>114</sup> can be found at: <https://mibig.secondarymetabolites.org/>

## References

- 1 M. S. Donia, W. F. Fricke, F. Partensky, J. Cox, S. I. Elshahawi, J. R. White, A. M. Phillippy, M. C. Schatz, J. Piel, M. G. Haygood, J. Ravel and E. W. Schmidt, *Proc. Natl. Acad. Sci. U. S. A.*, 2011, **108**, E1423-32.
- 2 S. Freitas, R. Castelo-Branco, A. Wenzel-Storjohann, V. M. Vasconcelos, D. Tasdemir and P. N. Leão, *J. Nat. Prod.*, 2022, **85**, 1704–1714.
- 3 Y. Kanesaki, M. Hirose, Y. Hirose, T. Fujisawa, Y. Nakamura, S. Watanabe, S. Matsunaga, H. Uchida and A. Murakami, *Genome Announc.*, 2018, **6**, e00021-18.
- 4 L. E. Moraes, M. J. Blow, E. R. Hawley, H. Piao, R. Kuo, J. Chiniqy, N. Shapiro, T. Woyke, J. G. Fadel and M. Hess, *AMB Express*, 2017, **7**, 42–42.
- 5 K. Gutiérrez-García, E. D. Bustos-Díaz, J. A. Corona-Gómez, H. E. Ramos-Aboites, N. Sélem-Mojica, P. Cruz-Morales, M. A. Pérez-Farrera, F. Barona-Gómez and A. Cibrián-Jaramillo, *Genome Biol. Evol.*, 2018, **11**, 319–334.
- 6 N. Eusebio, A. Rego, N. R. Glasser, R. Castelo-Branco, E. P. Balskus and P. N. Leão, *BMC Genom.*, 2021, **22**, 633.
- 7 P. Bell-Doyon, J. Laroche, K. Saltonstall and J. C. Villarreal Aguilar, *Environ. DNA*, 2020, **2**, 418–428.
- 8 J. A. Hilton, R. A. Foster, H. James Tripp, B. J. Carter, J. P. Zehr and T. A. Villareal, *Nat. Commun.*, 2013, **4**, 1767.
- 9 T. Nakayama, R. Kamikawa, G. Tanifuji, Y. Kashiyama, N. Ohkouchi, J. M. Archibald and Y. Inagaki, *Proc. Natl. Acad. Sci. U.S.A.*, 2014, **111**, 11407–12.
- 10 E. Flores, D. K. Romanovicz, M. Nieves-Mori6n, R. A. Foster and T. A. Villareal, *Front. Microbiol.*
- 11 T. Nakayama, M. Nomura, Y. Takano, G. Tanifuji, K. Shiba, K. Inaba, Y. Inagaki and M. Kawata, *Proc. Natl. Acad. Sci. U.S.A.*, 2019, **116**, 15973.
- 12 D. H. Parks, C. Rinke, M. Chuvochina, P.-A. Chaumeil, B. J. Woodcroft, P. N. Evans, P. Hugenholtz and G. W. Tyson, *Nat. Microbiol.*, 2017, **2**, 1533–1542.
- 13 D. Bombar, P. Heller, P. Sanchez-Baracaldo, B. J. Carter and J. P. Zehr, *ISME J.*, 2014, **8**, 2530–2542.
- 14 H. J. Tripp, S. R. Bench, K. A. Turk, R. A. Foster, B. A. Desany, F. Niazi, J. P. Affourtit and J. P. Zehr, *Nature*, 2010, **464**, 90–94.
- 15 D. Warshan, A. Liaimer, E. Pederson, S. Y. Kim, N. Shapiro, T. Woyke, B. Altermark, K. Pawlowski, P. D. Weyman, C. L. Dupont and U. Rasmussen, *Mol. Biol. Evol.*, 2018, **35**, 1160–1175.
- 16 B. S. Pratte and T. Thiel, *Microb. Genom.*, 2021, **7**, 000595.
- 17 L. Ran, J. Larsson, T. Vigil-Stenman, J. A. A. Nylander, K. Ininbergs, W.-W. Zheng, A. Lapidus, S. Lowry, R. Haselkorn and B. Bergman, *PLoS ONE*, 2010, **5**, e11486.
- 18 N. Rahmatpour, D. A. Hauser, J. M. Nelson, P. Y. Chen, J. C. Villarreal A., M.-Y. Ho and F.-W. Li, *Curr. Biol.*, 2021, **31**, 2857-2867.e4.
- 19 J. M. Nelson, D. A. Hauser, J. A. Gudiño, Y. A. Guadalupe, J. C. Meeks, N. Salazar Allen, J. C. Villarreal and F.-W. Li, *Genome Biol. Evol.*, 2019, **11**, 1959–1964.
- 20 A. Tippelt, T. Busche, C. Rückert and M. Nett, *Microbiol. Resour. Announc.*, 2020, **9**, e00040-20.
- 21 L. Cornet, N. Magain, D. Baurain and F. Lutzoni, *Mol. Phylogenet. Evol.*, 2021, **162**, 107100.
- 22 A. N. Gagunashvili and Ó. S. Andrés6n, *BMC Genom.*, 2018, **19**, 434.
- 23 M.-J. H. Hals6r, A. Liaimer, S. Pandur, I. L. U. Ræder, A. O. Smalås and B. Altermark, *Microbiol. Resour. Announc.*, 2019, **8**, e01190-19.
- 24 I. Burgsdorf, K. M. Handley, R. Bar-Shalom, P. M. Erwin and L. Steindler, *mSystems*, 2019, **4**, e00057-19.
- 25 S. Podell, J. M. Blanton, A. Oliver, M. A. Schorn, V. Agarwal, J. S. Biggs, B. S. Moore and E. E. Allen, *Microbiome*, 2020, **8**, 97.

- 26 I. Burgsdorf, B. M. Slaby, K. M. Handley, M. Haber, J. Blom, C. W. Marshall, J. A. Gilbert, U. Hentschel and L. Steindler, *mBio*, 2015, **6**, e00391-15.
- 27 B. M. Slaby and U. Hentschel, *Genome Announc.*, 2017, **5**, e00268-17.
- 28 F. Liu, J. Li and Z. Li, *Genome Announc.*, 2017, **5**, e01307-16.
- 29 Z.-M. Gao, Y. Wang, R.-M. Tian, Y. H. Wong, Z. B. Batang, A. M. Al-Suwailem, V. B. Bajic and P.-Y. Qian, *mBio*, 2014, **5**, e00079-14.
- 30 M. A. Schorn, P. A. Jordan, S. Podell, J. M. Blanton, V. Agarwal, J. S. Biggs, E. E. Allen and B. S. Moore, *mBio*, 2019, **10**, e00821-19.
- 31 D. Konstantinou, R. V. Popin, D. P. Fewer, K. Sivonen and S. Gkelis, *Mar. Drugs*, 2021, **19**, 298.
- 32 A. Liaimer, J. B. Jensen and E. Dittmann, *Front. Microbiol.*, 2016, **7**, 1693.
- 33 A. R. Carroll, G. K. Pierens, G. Fechner, P. de Almeida Leone, A. Ngo, M. Simpson, E. Hyde, J. N. A. Hooper, S.-L. Boström, D. Musil and R. J. Quinn, *J. Am. Chem. Soc.*, 2002, **124**, 13340–13341.
- 34 A. R. Carroll, M. S. Buchanan, A. Edser, E. Hyde, M. Simpson and R. J. Quinn, *J. Nat. Prod.*, 2004, **67**, 1291–1294.
- 35 Y. K.-H. Schneider, A. Liaimer, J. Isaksson, O. S. B. Wilhelmsen, J. H. Andersen, K. Ø. Hansen and E. H. Hansen, *Front. Microbiol.*, 2023, **14**, 1130018.
- 36 Guljamow Arthur, Kreische Marco, Ishida Keishi, Liaimer Anton, Altermark Bjørn, Bähr Lars, Hertweck Christian, Ehwald Rudolf, Dittmann Elke, and Vieille Claire, *Appl. Environ. Microbiol.*, 2017, **83**, e01510-17.
- 37 D. Dehm, J. Krumbholz, M. Baunach, V. Wiebach, K. Hinrichs, A. Guljamow, T. Tabuchi, H. Jenke-Kodama, R. D. Süssmuth and E. Dittmann, *ACS Chem. Biol.*, 2019, **14**, 1271–1279.
- 38 L. Rouhiainen, J. Jokela, D. P. Fewer, M. Urmann and K. Sivonen, *Chem. Biol.*, 2010, **17**, 265–273.
- 39 C. Greunke, E. R. Duell, P. M. D'Agostino, A. Glöckle, K. Lamm and T. A. M. Gulder, *Metab. Eng.*, 2018, **47**, 334–345.
- 40 H. Schreuder, A. Liesum, P. Lönze, H. Stump, H. Hoffmann, M. Schiell, M. Kurz, L. Toti, A. Bauer, C. Kallus, C. Klemke-Jahn, J. Czech, D. Kramer, H. Enke, T. H. J. Niedermeyer, V. Morrison, V. Kumar and M. Brönstrup, *Sci. Rep.*, 2016, **6**, 32958.
- 41 T. Soule, V. Stout, W. D. Swingley, J. C. Meeks and F. Garcia-Pichel, *J. Bacteriol.*, 2007, **189**, 4465–4472.
- 42 N. A. Magarvey, Z. Q. Beck, T. Golakoti, Y. Ding, U. Huber, T. K. Hemscheidt, D. Abelson, R. E. Moore and D. H. Sherman, *ACS Chem. Biol.*, 2006, **1**, 766–779.
- 43 Y. Hamamoto, M. Endo, M. Nakagawa, T. Nakanishi and K. Mizukawa, *J. Chem. Soc., Chem. Commun.*, 1983, 323–324.
- 44 B. M. Degnan, C. J. Hawkins, M. F. Lavin, E. J. McCaffrey, D. L. Parry and D. J. Watters, *J. Med. Chem.*, 1989, **32**, 1354–1359.
- 45 M. P. Foster, G. P. Concepcion, G. B. Caraan and C. M. Ireland, *J. Org. Chem.*, 1992, **57**, 6671–6675.
- 46 L. J. Perez and D. J. Faulkner, *J. Nat. Prod.*, 2003, **66**, 247–250.
- 47 C. Urda, R. Fernández, J. Rodríguez, M. Pérez, C. Jiménez and C. Cuevas, *Mar. Drugs*, 2017, **15**, 209.
- 48 A. Rudi, M. Akin, E. M. Gaydou and Y. Kashman, *Tetrahedron*, 1998, **54**, 13203–13210.
- 49 A. Rudi, L. Chill, M. Akin and Y. Kashman, *J. Nat. Prod.*, 2003, **66**, 575–577.
- 50 T. Teruya, H. Sasaki and K. Suenaga, *Tetrahedron Lett.*, 2008, **49**, 5297–5299.
- 51 M. S. Donia, J. Ravel and E. W. Schmidt, *Nat. Chem. Biol.*, 2008, **4**, 341–343.
- 52 J. M. Wasylyk, J. E. Biskupiak, C. E. Costello and C. M. Ireland, *J. Org. Chem.*, 1983, **48**, 4445–4449.
- 53 F. J. Schmitz, M. B. Ksebati, J. S. Chang, J. L. Wang, M. B. Hossain, D. Van der Helm, M. H. Engel, A. Serban and J. A. Silfer, *J. Org. Chem.*, 1989, **54**, 3463–3472.

- 54 B. M. Degnan, C. J. Hawkins, M. F. Lavin, E. J. McCaffrey, D. L. Parry, A. L. Van den Brenk and D. J. Watters, *J. Med. Chem.*, 1989, **32**, 1349–1354.
- 55 C. J. Hawkins, M. F. Lavin, K. A. Marshall, A. L. Van den Brenk and D. J. Watters, *J. Med. Chem.*, 1990, **33**, 1634–1638.
- 56 L. A. Morris, J. Jantina Kettesen van den Bosch, K. Versluis, G. S. Thompson and M. Jaspars, *Tetrahedron*, 2000, **56**, 8345–8353.
- 57 M. S. Donia, D. E. Ruffner, S. Cao and E. W. Schmidt, *ChemBioChem*, 2011, **12**, 1230–1236.
- 58 A. R. Carroll, B. F. Bowden, J. C. Coll, D. C. R. Hockless, B. W. Skelton and A. H. White, *Aust. J. Chem.*, 1994, **47**, 61–69.
- 59 Ma. D. B. Tianero, M. S. Donia, T. S. Young, P. G. Schultz and E. W. Schmidt, *J. Am. Chem. Soc.*, 2012, **134**, 418–425.
- 60 M. S. Donia, B. Wang, D. C. Dunbar, P. V. Desai, A. Patny, M. Avery and M. T. Hamann, *J. Nat. Prod.*, 2008, **71**, 941–945.
- 61 M. S. Donia, W. F. Fricke, J. Ravel and E. W. Schmidt, *PLoS ONE*, 2011, **6**, e17897.
- 62 Z. Lu, M. K. Harper, C. D. Pond, L. R. Barrows, C. M. Ireland and R. M. Van Wagoner, *J. Nat. Prod.*, 2012, **75**, 1436–1440.
- 63 M. P. Foster and C. M. Ireland, *Tetrahedron Lett.*, 1993, **34**, 2871–2874.
- 64 E. W. Schmidt, J. T. Nelson, D. A. Rasko, S. Sudek, J. A. Eisen, M. G. Haygood and J. Ravel, *Proc. Natl. Acad. Sci. U.S.A.*, 2005, **102**, 7315–7320.
- 65 T. Ishida, Y. In, F. Shinozaki, M. Doi, D. Yamamoto, Y. Hamada, T. Shioiri, M. Kamigauchi and M. Sugiura, *J. Org. Chem.*, 1995, **60**, 3944–3952.
- 66 L. A. McDonald and C. M. Ireland, *J. Nat. Prod.*, 1992, **55**, 376–379.
- 67 M. A. Rashid, K. R. Gustafson, J. H. I. Cardellina and M. R. Boyd, *J. Nat. Prod.*, 1995, **58**, 594–597.
- 68 X. Fu, T. Do, F. J. Schmitz, V. Andrushevich and M. H. Engel, *J. Nat. Prod.*, 1998, **61**, 1547–1551.
- 69 A. R. Carroll, J. C. Coll, D. J. Bourne, J. K. Macleod, T. M. Zabriskie, C. M. Ireland and B. F. Bowden, *Aust. J. Chem.*, 1996, **49**, 659–667.
- 70 D. F. Sesin, S. J. Gaskell and C. M. Ireland, *Bull. Soc. Chim. Belg.*, 1986, **95**, 853–867.
- 71 A. D. Patil, A. J. Freyer, L. Killmer, C. Chambers-myers and R. K. Johnson, *Nat. Prod. Lett.*, 1997, **9**, 181–187.
- 72 L. A. McDonald, M. P. Foster, D. R. Phillips, C. M. Ireland, A. Y. Lee and J. Clardy, *J. Org. Chem.*, 1992, **57**, 4616–4624.
- 73 C. Ireland and P. J. Scheuer, *J. Am. Chem. Soc.*, 1980, **102**, 5688–5691.
- 74 M. Jaspars, *Chem. Commun.*, 2014, **50**, 10174–10176.
- 75 D. E. Williams, R. E. Moore and V. J. Paul, *J. Nat. Prod.*, 1989, **52**, 732–739.
- 76 T. W. Hambley, C. J. Hawkins, M. F. Lavin, A. van den Brenk and D. J. Watters, *Tetrahedron*, 1992, **48**, 341–348.
- 77 X. Yang, Y. Shimizu, J. R. Steiner and J. Clardy, *Tetrahedron Lett.*, 1993, **34**, 761–764.
- 78 J. Krumbholz, K. Ishida, M. Baunach, J. E. Teikari, M. M. Rose, S. Sasso, C. Hertweck and E. Dittmann, *Angew. Chem. Int. Ed.*, 2022, **61**, e202204545.
- 79 T. E. Smith, C. D. Pond, E. Pierce, Z. P. Harmer, J. Kwan, M. M. Zachariah, M. K. Harper, T. P. Wyche, T. K. Matainaho, T. S. Bugni, L. R. Barrows, C. M. Ireland and E. W. Schmidt, *Nat. Chem. Biol.*, 2018, **14**, 179–185.
- 80 V. Shukla, R. Kumari, D. K. Patel and D. K. Upreti, *Amino Acids*, 2016, **48**, 129–136.

- 81 W. M. Bandaranayake, J. E. Bemis and D. J. Bourne, *Comp. Biochem. Physiol. C, Pharmacol. Toxicol. Endocrinol.*, 1996, **115**, 281–286.
- 82 Q. Gao and F. Garcia-Pichel, *J. Bacteriol.*, 2011, **193**, 5923–5928.
- 83 T. Golakoti, W. Y. Yoshida, S. Chaganty and R. E. Moore, *J. Nat. Prod.*, 2001, **64**, 54–59.
- 84 A. Liaimer, E. J. N. Helfrich, K. Hinrichs, A. Guljamow, K. Ishida, C. Hertweck and E. Dittmann, *Proc. Natl. Acad. Sci. U.S.A.*, 2015, **112**, 1862–1867.
- 85 A. Kampa, A. N. Gagunashvili, T. A. Gulder, B. I. Morinaka, C. Daolio, M. Godejohann, V. P. Miao, J. Piel and Ó. Andrésón, *Proc. Natl. Acad. Sci. U.S.A.*, 2013, **110**, E3129-37.
- 86 Ilona Oksanen, J. Jokela, D. P. Fewer, M. Wahlsten, J. Rikkinen and K. Sivonen, *Appl. Environ. Microbiol.*, 2004, **70**, 5756.
- 87 U. Kaasalainen, J. Jokela, D. P. Fewer, K. Sivonen and J. Rikkinen, *Mol. Plant Microbe Interact.*, 2009, **22**, 695–702.
- 88 U. Kaasalainen, D. P. Fewer, J. Jokela, M. Wahlsten, K. Sivonen and J. Rikkinen, *Proc. Natl. Acad. Sci. U.S.A.*, 2012, **109**, 5886–5891.
- 89 M. M. Gehringer, L. Adler, A. A. Roberts, M. C. Moffitt, T. K. Mihali, T. J. T. Mills, C. Fieker and B. A. Neilan, *ISME J.*, 2012, **6**, 1834–1847.
- 90 V. Agarwal, J. M. Blanton, S. Podell, A. Taton, M. A. Schorn, J. Busch, Z. Lin, E. W. Schmidt, P. R. Jensen, V. J. Paul, J. S. Biggs, J. W. Golden, E. E. Allen and B. S. Moore, *Nat. Chem. Biol.*, 2017, **13**, 537–543.
- 91 M. D. Unson, C. B. Rose, D. J. Faulkner, L. S. Brinen, J. R. Steiner and J. Clardy, *J. Org. Chem.*, 1993, **58**, 6336–6343.
- 92 K. L. Erickson and R. J. Wells, *Aust. J. Chem.*, 1982, **35**, 31–38.
- 93 R. Kazlauskas, P. T. Murphy and R. J. Wells, *Tetrahedron Lett.*, 1978, **19**, 4945–4948.
- 94 P. Sauleau, P. Retailleau, J. Vacelet and M.-L. Bourguet-Kondracki, *Tetrahedron*, 2005, **61**, 955–963.
- 95 G. G. Harrigan, G. H. Goetz, H. Luesch, S. Yang and J. Likos, *J. Nat. Prod.*, 2001, **64**, 1133–1138.
- 96 M. M. Kapojos, D. B. Abdjul, H. Yamazaki, T. Ohshiro, H. Rotinsulu, D. S. Wewengkang, D. A. Sumilat, H. Tomoda, M. Namikoshi and R. Uchida, *Bioorg. Med. Chem. Lett.*, 2018, **28**, 1911–1914.
- 97 A. E. Flowers, M. J. Garson, R. I. Webb, E. J. Dumdei and R. D. Charan, *Cell Tissue Res.*, 1998, **292**, 597–607.
- 98 E. J. Dumdei, J. S. Simpson, M. J. Garson, K. A. Byriel and C. H. L. Kennard, *Aust. J. Chem.*, 1997, **50**, 139–144.
- 99 J.-Y. Su, Y.-L. Zhong, L.-M. Zeng, S. Wei, Q.-W. Wang, T. C. W. Mak and Z.-Y. Zhou, *J. Nat. Prod.*, 1993, **56**, 637–642.
- 100 X. Fu, L.-M. Zeng, J.-Y. Su and M. Pais, *J. Nat. Prod.*, 1997, **60**, 695–696.
- 101 X. Fu, M. L. G. Ferreira, F. J. Schmitz and M. Kelly-Borges, *J. Nat. Prod.*, 1998, **61**, 1226–1231.
- 102 X. Fu, J.-Y. Su and L.-M. Zeng, *Chin. J. Chem.*, 2000, **18**, 882–885.
- 103 T. Gebreyesusa, T. Yosief, S. Carmely and Y. Kashmanb, *Tetrahedron Lett.*, 1988, **29**, 3863–3864.
- 104 S. Isaacs, R. Berman, Y. Kashman, T. Gebreyesus and T. Yosief, *J. Nat. Prod.*, 1991, **54**, 83–91.
- 105 K. S. Ramage, A. C. Taki, K. Y. Lum, S. Hayes, J. J. Byrne, T. Wang, A. Hofmann, M. G. Ekins, J. M. White, A. Jabbar, R. A. Davis and R. B. Gasser, *Mar. Drugs*, 2021, **19**, 698.
- 106 R. Kazlauskas, R. O. Lidgard, R. J. Wells and W. Vetter, *Tetrahedron Lett.*, 1977, **18**, 3183–3186.
- 107 W. Hofheinz and W. E. Oberhänsli, *Helv. Chim. Acta*, 1977, **60**, 660–669.
- 108 W. D. Clark and P. Crews, *Tetrahedron Lett.*, 1995, **36**, 1185–1188.
- 109 C. Charles, J. C. Braeknan, D. Dalozé, B. Tursch and R. Karlsson, *Tetrahedron Lett.*, 1978, **19**, 1519–1520.

- 110 J. B. MacMillan, E. K. Trousdale and T. F. Molinski, *Org. Lett.*, 2000, **2**, 2721–2723.
- 111 M. D. Sadar, D. E. Williams, N. R. Mawji, B. O. Patrick, T. Wikanta, E. Chasanah, H. E. Irianto, R. V. Soest and R. J. Andersen, *Org. Lett.*, 2008, **10**, 4947–4950.
- 112 B. L. Stapleton, G. M. Cameron and M. J. Garson, *Tetrahedron*, 2001, **57**, 4603–4607.
- 113 Steven Giglio, J. Jiang, C. P. Saint, D. E. Cane and P. T. Monis, *Environ. Sci. Technol.*, 2008, **42**, 8027–8032.
- 114 B. R. Terlouw, K. Blin, J. C. Navarro-Muñoz, N. E. Avalon, M. G. Chevrette, S. Egbert, S. Lee, D. Meijer, M. J. J. Recchia, Z. L. Reitz, J. A. van Santen, N. Selem-Mojica, T. Tørring, L. Zaroubi, M. Alanjary, G. Aleti, C. Aguilar, S. A. A. Al-Salihi, H. E. Augustijn, J. A. Avelar-Rivas, L. A. Avitia-Domínguez, F. Barona-Gómez, J. Bernaldo-Agüero, V. A. Bielinski, F. Biermann, T. J. Booth, V. J. Carrion Bravo, R. Castelo-Branco, F. O. Chagas, P. Cruz-Morales, C. Du, K. R. Duncan, A. Gavriilidou, D. Gayrard, K. Gutiérrez-García, K. Haslinger, E. J. N. Helfrich, J. J. J. van der Hooft, A. P. Jati, E. Kalkreuter, N. Kalyvas, K. B. Kang, S. Kautsar, W. Kim, A. M. Kunjapur, Y.-X. Li, G.-M. Lin, C. Loureiro, J. J. R. Louwen, N. L. L. Louwen, G. Lund, J. Parra, B. Philmus, B. Pourmohsenin, L. J. U. Pronk, A. Rego, D. A. B. Rex, S. Robinson, L. R. Rosas-Becerra, E. T. Roxborough, M. A. Schorn, D. J. Scobie, K. S. Singh, N. Sokolova, X. Tang, D. Udworthy, A. Vigneshwari, K. Vind, S. P. J. M. Vromans, V. Waschulin, S. E. Williams, J. M. Winter, T. E. Witte, H. Xie, D. Yang, J. Yu, M. Zdouc, Z. Zhong, J. Collemare, R. G. Linington, T. Weber and M. H. Medema, *Nucleic Acids Res.*, 2022, gkac1049.
